# Supplementary material for: Pharmacokinetics, Tissue Distribution, Metabolism, and Excretion of Naringin in Aged Rats
Source: PubMed Central journal article supplement (PMC6362423; doi:10.3389/fphar.2019.00034), 2019-01-28
Supplement: Data_Sheet_1.pdf [file Data_Sheet_1.pdf]

## Supplementary Materials

### Journal name

Frontiers in Pharmacology

### Article title

Pharmacokinetics, tissue distribution, metabolism, and excretion of naringin in aged rats

### Contents

1. Table S1 (*Page 2-3*)
2. Table S2 (*Page 4*)
3. Table S3 (*Page 5-9*)
4. Table S4 (*Page 10-14*)
5. Table S5 (*Page 15*)
6. Table S6 (*Page 15*)
7. Figure S1 (*Page 16*)

Supplementary Materials

Table S1. Results of method validation for the determination of naringin (NG), naringenin (NE), hesperetin (HE), apigenin (AE), hippuric acid (HA), 4-hydroxybenzoic acid (4HBA), and 3-(4'-hydroxyphenyl)propionic acid (4HPPA) in biological samples.

| Matrix     | Compounds | Calibration curve<br>range (ng/mL) | Linearity equations    | r      | Within-run precisions (%) (n=6) |                      | Between-run precisions | Coefficient of variation of<br>matrix factors (%) (n=6) |      |
|------------|-----------|------------------------------------|------------------------|--------|---------------------------------|----------------------|------------------------|---------------------------------------------------------|------|
|            |           |                                    |                        |        | LLOQ <sup>a</sup>               | L, M, H <sup>b</sup> | (%) (n=18)             | L                                                       | H    |
| Plasma     | NG        | 4.820~1928                         | Y=0.0743*X+2.057E-005  | 0.9979 | 10.6~17.2                       | 5.2~8.6              | 6.2~14.8               | 2.9                                                     | 0.8  |
|            | NE        | 5.450~2180                         | Y=0.0881*X-8.353E-005  | 0.9986 | 5.8~13.1                        | 3.0~14.2             | 4.6~12.9               | 4.3                                                     | 2.2  |
| Stomach    | NG        | 9.640~3856                         | Y=0.1404*X-1.248E-004  | 0.9950 | 4.2~8.5                         | 3.0~9.5              | 3.9~7.0                | 11.9                                                    | 9.5  |
|            | NE        | 5.450~2180                         | Y=0.3253*X-1.504E-004  | 0.9944 | 3.4~7.9                         | 2.1~6.2              | 2.9~6.3                | 10.4                                                    | 12.7 |
| Intestines | NG        | 9.640~3856                         | Y=0.2757*X-7.658E-004  | 0.9939 | 4.3~10.6                        | 0.6~3.1              | 2.3~7.9                | 2.1                                                     | 13.1 |
|            | NE        | 5.450~2180                         | Y=0.2724*X-8.390E-005  | 0.9982 | 5.3~11.3                        | 2.1~5.9              | 3.5~8.2                | 13.8                                                    | 9.9  |
| Liver      | NG        | 4.820~964.0                        | Y=0.1958*X+9.865E-004  | 0.9977 | 9.4~12.4                        | 1.3~10.2             | 5.9~11.0               | 5.4                                                     | 8.7  |
|            | NE        | 5.450~1090                         | Y=0.1849*X-2.139E-004  | 0.9959 | 8.8~11.9;                       | 2.9~12.9             | 8.6~11.4               | 3.7                                                     | 8.5  |
| Kidney     | NG        | 2.410~482.0                        | Y=0.5159*X-0.0011      | 0.9968 | 11.6~14.9                       | 2.1~12.0             | 2.4~13.9               | 5.4                                                     | 3.3  |
|            | NE        | 5.450~1090                         | Y=0.7359*X-0.0048      | 0.9926 | 7.2~15.1                        | 2.3~9.4              | 3.7~10.9               | 9.4                                                     | 7.9  |
| Trachea    | NG        | 4.820~482.0                        | Y=0.0484*X-4.888E-005  | 0.9951 | 11.0~14.8                       | 2.8~13.0             | 8.7~14.7               | 8.7                                                     | 4.2  |
|            | NE        | 2.725~272.5                        | Y=0.3431*X-0.0012      | 0.9980 | 1.9~9.4                         | 7.8~12.3             | 7.3~11.1               | 9.0                                                     | 12.8 |
| Lung       | NG        | 2.410~241.0                        | Y=0.1125*X-8.2494E-004 | 0.9961 | 7.0~11.1                        | 1.9~10.0             | 3.0~11.0               | 4.4                                                     | 2.6  |
|            | NE        | 2.725~272.5                        | Y=0.4211*X-0.0012      | 0.9986 | 5.1~13.5                        | 2.3~8.1              | 4.1~10.0               | 13.6                                                    | 13.8 |
| Heart      | NG        | 2.410~241.0                        | Y=0.1399*X+5.7987E-004 | 0.9947 | 11.1~13.9                       | 2.3~13.7             | 6.7~11.9               | 5.4                                                     | 1.4  |
|            | NE        | 2.725~272.5                        | Y=0.1780*X+0.0010      | 0.9965 | 6.2~11.1                        | 5.5~10.0             | 7.2~10.6               | 9.2                                                     | 10.6 |
| Spleen     | NG        | 2.410~241.0                        | Y=0.1361*X-6.2228E-005 | 0.9989 | 9.6~18.3                        | 2.0~10.6             | 3.0~14.5               | 4.0                                                     | 2.0  |
|            | NE        | 2.725~272.5                        | Y=0.4076*X-9.9717E-004 | 0.9953 | 6.1~9.2                         | 3.2~9.7              | 5.4~8.2                | 13.2                                                    | 14.8 |
| Muscle     | NG        | 2.410~241.0                        | Y=0.1143*X+4.4749E-004 | 0.9954 | 6.8~19.4                        | 6.1~12.0             | 8.1~14.8               | 1.5                                                     | 1.5  |
|            | NE        | 2.725~272.5                        | Y=0.4584*X-0.0016      | 0.9962 | 7.8~10.8                        | 1.9~9.2              | 5.1~8.9                | 4.6                                                     | 2.5  |

Supplementary Materials

|       |       |              |                             |        |           |          |          |      |      |
|-------|-------|--------------|-----------------------------|--------|-----------|----------|----------|------|------|
| Fat   | NG    | 2.410~241.0  | $Y=0.0188*X+1.0842E-004$    | 0.9987 | 10.5~14.5 | 2.9~8.8  | 5.3~12.7 | 4.4  | 7.7  |
|       | NE    | 2.725~272.5  | $Y=0.0132*X-2.8570E-005$    | 0.9960 | 4.3~18.9  | 2.7~10.3 | 3.4~12.2 | 14.3 | 13.0 |
| Brain | NG    | 2.410~241.0  | $Y=0.1334*X+5.1398E-004$    | 0.9950 | 6.6~17.2  | 3.5~11.2 | 7.6~12.6 | 2.4  | 0.3  |
|       | NE    | 2.725~272.5  | $Y=0.3706*X+2.1430E-005$    | 0.9976 | 5.9~18.3  | 1.1~11.9 | 3.2~14.1 | 11.6 | 4.6  |
| Urine | NG    | 2.470~988.0  | $Y=129.5*X+303.6$           | 0.9993 | 10.1~12.7 | 1.8~11.2 | 7.1~11.0 | 9.0  | 5.8  |
|       | NE    | 26.80~10720  | $Y=115.5*X-758.0$           | 0.9989 | 4.6~6.0   | 0.9~6.4  | 3.6~5.5  | 9.4  | 7.4  |
|       | HE    | 2.427~970.9  | $Y=24.70*X+4.700$           | 0.9986 | 6.8~12.2  | 2.5~14.6 | 5.9~12.3 | 5.6  | 5.4  |
|       | AE    | 12.46~4986   | $Y=39.20*X+79.00$           | 0.9995 | 6.4~9.1   | 1.3~7.5  | 2.3~8.2  | 3.4  | 5.8  |
|       | HA    | 5575~55750   | $Y=2621.5*X+54215.3$        | 0.9966 | 5.9~10.3  | 2.2~10.0 | 4.9~9.7  | 13.8 | 8.2  |
|       | 4HBA  | 1087~10870   | $Y=2368.3*X+2391.1$         | 0.9979 | 3.6~11.5  | 2.7~8.9  | 5.5~8.9  | 6.3  | 9.7  |
|       | 4HPPA | 9996~99960   | $Y=911.5*X+25749.8$         | 0.9960 | 5.2~10.9  | 2.4~9.9  | 5.2~8.2  | 5.9  | 8.6  |
| Feces | NG    | 1.976~197.6  | $Y=9.732E-006*X+1.031E-004$ | 0.9989 | 8.2~12.0  | 4.7~11.0 | 8.0~11.4 | 8.9  | 5.8  |
|       | NE    | 2.144~214.4  | $Y=1.406E-004*X-9.754E-005$ | 0.9960 | 4.1~14.3  | 1.7~9.3  | 3.2~9.0  | 4.6  | 3.0  |
|       | HE    | 1.942~194.2  | $Y=1.441E-005*X-9.553E-006$ | 0.9989 | 9.0~9.7   | 2.5~11.1 | 3.9~10.0 | 13.3 | 3.3  |
|       | AE    | 0.9972~99.72 | $Y=4.950E-005*X+1.520E-005$ | 0.9980 | 8.8~10.0  | 2.5~10.9 | 5.4~10.2 | 8.3  | 2.6  |
|       | HA    | 278.8~2788   | $Y=0.0085*X+3.044E-004$     | 0.9985 | 4.3~10.2  | 1.7~10.4 | 5.7~7.9  | 1.5  | 2.2  |
|       | 4HBA  | 271.8~2718   | $Y=0.0075*X+2.078E-004$     | 0.9954 | 4.8~10.1  | 3.6~10.2 | 5.6~8.6  | 5.3  | 3.5  |
|       | 4HPPA | 2499~24990   | $Y=0.0032*X+0.0167$         | 0.9932 | 9.0~10.2  | 3.4~8.7  | 6.6~9.9  | 2.9  | 5.0  |

<sup>a</sup> LLOQ, lower limit of quantification.

<sup>b</sup> L, M, H represent low, middle, high QC concentration levels, respectively.

Supplementary Materials

Table S2. AUC, C<sub>max</sub> and T<sub>max</sub> for naringin and total naringenin in tissues after a single oral administration of 42 mg/kg naringin to aged rats.

| Tissues  | Naringin     |                         |                      | Total naringenin |                         |                      |
|----------|--------------|-------------------------|----------------------|------------------|-------------------------|----------------------|
|          | AUC (ng*h/g) | C <sub>max</sub> (ng/g) | T <sub>max</sub> (h) | AUC (ng*h/g)     | C <sub>max</sub> (ng/g) | T <sub>max</sub> (h) |
| Stomach  | 658476       | 820478                  | 0.25                 | 111641           | 38431                   | 0.25                 |
| Duodenum | 840117       | 1232198                 | 0.25                 | 473033           | 70936                   | 6                    |
| Jejunum  | 2404138      | 1059446                 | 1                    | 1251818          | 182364                  | 6                    |
| Ileum    | 3761105      | 1003811                 | 1                    | 1490177          | 149457                  | 6                    |
| Colon    | 895386       | 214840                  | 3                    | 411298           | 56032                   | 3                    |
| Liver    | 5879         | 7087                    | 0.25                 | 121958           | 21423                   | 6                    |
| Kidney   | 5286         | 7691                    | 0.25                 | 65837            | 12706                   | 6                    |
| Lung     | 161811       | 108925                  | 1                    | 16294            | 2538                    | 1                    |
| Trachea  | 80225        | 52876                   | 1                    | 13826            | 3623                    | 1                    |
| Heart    | 1070         | 211.9                   | 0.25                 | 13530            | 1426                    | 6                    |
| Fat      | 1589         | 159.9                   | 10                   | 4308             | 490.3                   | 6                    |
| Spleen   | 1152         | 181.0                   | 0.25                 | 3163             | 479.7                   | 6                    |
| Muscle   | 1799         | 358.9                   | 0.25                 | 2306             | 291.3                   | 6                    |
| Brain    | 1040         | 222.9                   | 10                   | 913.0            | 75.9                    | 6                    |

Supplementary Materials

Table S3. UFLC-Q-TOF-MS/MS based identifications of flavonoid metabolites urine and feces samples collected 0-48 h after a single oral administration of naringin in aged rats.

| No.         | Identified metabolites                            | Formula                                         | RT<br>(min) | [M-H] <sup>-</sup><br>(Error, ppm) | Fragment ions in negative mode <sup>a</sup>                                                                                                                                                                                                                                                                                                                                                                                                                                                            | Source          |
|-------------|---------------------------------------------------|-------------------------------------------------|-------------|------------------------------------|--------------------------------------------------------------------------------------------------------------------------------------------------------------------------------------------------------------------------------------------------------------------------------------------------------------------------------------------------------------------------------------------------------------------------------------------------------------------------------------------------------|-----------------|
| Parent drug | Naringin <sup>b</sup>                             | C <sub>27</sub> H <sub>32</sub> O <sub>14</sub> | 11.4        | 579.1717<br>(-0.4)                 | 459.1196[M-H-C <sub>8</sub> H <sub>8</sub> O] <sup>-</sup> , 313.0713[M-H-C <sub>8</sub> H <sub>8</sub> O-Rha] <sup>-</sup> , 271.0601[M-H-Rha-Glc] <sup>-</sup> , 151.0024[M-H-Rha-Glc-C <sub>8</sub> H <sub>8</sub> O] <sup>-</sup>                                                                                                                                                                                                                                                                  | Urine,<br>Feces |
| M1          | Naringenin <sup>b</sup>                           | C <sub>15</sub> H <sub>12</sub> O <sub>5</sub>  | 13.7        | 271.0617<br>(1.8)                  | 177.0202[M-H-C <sub>6</sub> H <sub>6</sub> O] <sup>-</sup> , 151.0043[M-H-C <sub>8</sub> H <sub>8</sub> O] <sup>-</sup> , 119.0512[M-H-C <sub>7</sub> H <sub>4</sub> O <sub>4</sub> ] <sup>-</sup> , 107.0150[M-H-C <sub>8</sub> H <sub>8</sub> O-CO <sub>2</sub> ] <sup>-</sup> , 93.0366[M-H-C <sub>9</sub> H <sub>6</sub> O <sub>4</sub> ] <sup>-</sup> , 83.0147                                                                                                                                   | Urine,<br>Feces |
| M2          | Naringenin-5- <i>O</i> -glucuronide               | C <sub>21</sub> H <sub>20</sub> O <sub>11</sub> | 10.7        | 447.0932<br>(-0.2)                 | 271.0610[M-H-GlcUA] <sup>-</sup> , 175.0251[M-H-NE] <sup>-</sup> , 151.0037[M-H-GlcUA-C <sub>8</sub> H <sub>8</sub> O] <sup>-</sup> , 113.0259[M-H-NE-CO <sub>2</sub> -H <sub>2</sub> O] <sup>-</sup>                                                                                                                                                                                                                                                                                                  | Urine           |
| M3          | Naringenin-7- <i>O</i> -glucuronide <sup>b</sup>  | C <sub>21</sub> H <sub>20</sub> O <sub>11</sub> | 11.5        | 447.0941<br>(1.8)                  | 271.0611[M-H-GlcUA] <sup>-</sup> , 227.0715, 177.0191[M-H-GlcUA-C <sub>6</sub> H <sub>6</sub> O] <sup>-</sup> , 175.0239[M-H-NE] <sup>-</sup> , 151.0034[M-H-GlcUA-C <sub>8</sub> H <sub>8</sub> O] <sup>-</sup> , 119.0509[M-H-GlcUA-C <sub>7</sub> H <sub>4</sub> O <sub>4</sub> ] <sup>-</sup> , 113.0251[M-H-NE-CO <sub>2</sub> -H <sub>2</sub> O] <sup>-</sup> , 85.0318[M-H-NE-CO <sub>2</sub> -H <sub>2</sub> O-CO] <sup>-</sup>                                                                | Urine           |
| M4          | Naringenin-4'- <i>O</i> -glucuronide <sup>b</sup> | C <sub>21</sub> H <sub>20</sub> O <sub>11</sub> | 11.7        | 447.0942<br>(2.1)                  | 271.0614[M-H-GlcUA] <sup>-</sup> , 177.0197[M-H-GlcUA-C <sub>6</sub> H <sub>6</sub> O] <sup>-</sup> , 175.0252[M-H-NE] <sup>-</sup> , 151.0046[M-H-GlcUA-C <sub>8</sub> H <sub>8</sub> O] <sup>-</sup> , 119.0516[M-H-GlcUA-C <sub>7</sub> H <sub>4</sub> O <sub>4</sub> ] <sup>-</sup> , 113.0258[M-H-NE-CO <sub>2</sub> -H <sub>2</sub> O] <sup>-</sup> , 85.0320[M-H-NE-CO <sub>2</sub> -H <sub>2</sub> O-CO] <sup>-</sup>                                                                          | Urine           |
| M5          | Naringenin-4',7- <i>O</i> -diglucuronide          | C <sub>27</sub> H <sub>28</sub> O <sub>17</sub> | 8.7         | 623.1247<br>(-1.2)                 | 447.0915[M-H-GlcUA] <sup>-</sup> , 313.0691[M-H-GlcUA-C <sub>4</sub> H <sub>6</sub> O <sub>5</sub> ] <sup>-</sup> , 271.0600[M-H-2GlcUA] <sup>-</sup> , 175.0236[M-H-NE-GlcUA] <sup>-</sup> , 151.0033[M-H-2GlcUA-C <sub>8</sub> H <sub>8</sub> O] <sup>-</sup> , 113.0240[M-H-NE-GlcUA-CO <sub>2</sub> -H <sub>2</sub> O] <sup>-</sup> , 107.0143[M-H-2GlcUA-C <sub>8</sub> H <sub>8</sub> O-CO <sub>2</sub> ] <sup>-</sup> , 85.0310[M-H-NE-GlcUA-CO <sub>2</sub> -H <sub>2</sub> O-CO] <sup>-</sup> | Urine           |
| M6          | Naringenin-5,7- <i>O</i> -diglucuronide           | C <sub>27</sub> H <sub>28</sub> O <sub>17</sub> | 9.4         | 623.1257<br>(0.6)                  | 447.0943[M-H-GlcUA] <sup>-</sup> , 271.0610[M-H-2GlcUA] <sup>-</sup> , 175.0223[M-H-NE-GlcUA] <sup>-</sup> , 151.0027[M-H-2GlcUA-C <sub>8</sub> H <sub>8</sub> O] <sup>-</sup> , 113.0224[M-H-NE-GlcUA-CO <sub>2</sub> -H <sub>2</sub> O] <sup>-</sup>                                                                                                                                                                                                                                                 | Urine           |
| M7          | Naringenin-4',5- <i>O</i> -diglucuronide          | C <sub>27</sub> H <sub>28</sub> O <sub>17</sub> | 10.8        | 623.1240<br>(-2.2)                 | 447.0939[M-H-GlcUA] <sup>-</sup> , 313.0705[M-H-GlcUA-C <sub>4</sub> H <sub>6</sub> O <sub>5</sub> ] <sup>-</sup> , 271.0618[M-H-2GlcUA] <sup>-</sup> , 175.0244[M-H-NE-GlcUA] <sup>-</sup> , 151.0033[M-H-2GlcUA-C <sub>8</sub> H <sub>8</sub> O] <sup>-</sup> ,                                                                                                                                                                                                                                      | Urine           |

Supplementary Materials

|     |                                                      |                                                                |      |                    |                                                                                                                                                                                                                                                                                                                                                                                                                                                                                                                                                                                                                                                                                                                                                                                  |       |
|-----|------------------------------------------------------|----------------------------------------------------------------|------|--------------------|----------------------------------------------------------------------------------------------------------------------------------------------------------------------------------------------------------------------------------------------------------------------------------------------------------------------------------------------------------------------------------------------------------------------------------------------------------------------------------------------------------------------------------------------------------------------------------------------------------------------------------------------------------------------------------------------------------------------------------------------------------------------------------|-------|
| M8  | Naringenin-4'- <i>O</i> -sulfate                     | C <sub>15</sub> H <sub>12</sub> O <sub>8</sub> S               | 10.0 | 351.0181<br>(0.2)  | 113.0254[M-H-NE-GlcUA-CO <sub>2</sub> -H <sub>2</sub> O] <sup>-</sup><br>271.0610[M-H-SO <sub>3</sub> ] <sup>-</sup> , 177.0182[M-H-SO <sub>3</sub> -C <sub>6</sub> H <sub>6</sub> O] <sup>-</sup> , 165.0180[M-H-SO <sub>3</sub> -<br>C <sub>7</sub> H <sub>6</sub> O] <sup>-</sup> , 151.0038[M-H-SO <sub>3</sub> -C <sub>8</sub> H <sub>8</sub> O] <sup>-</sup> , 119.0510[M-H-SO <sub>3</sub> -C <sub>7</sub> H <sub>4</sub> O <sub>4</sub> ] <sup>-</sup> ,<br>107.0158[M-H-SO <sub>3</sub> -C <sub>8</sub> H <sub>8</sub> O-CO <sub>2</sub> ] <sup>-</sup> , 93.0366[M-H-SO <sub>3</sub> -C <sub>9</sub> H <sub>6</sub> O <sub>4</sub> ] <sup>-</sup> , 83.0152                                                                                                            | Urine |
| M9  | Naringenin-7- <i>O</i> -sulfate                      | C <sub>15</sub> H <sub>12</sub> O <sub>8</sub> S               | 12.1 | 351.0186<br>(1.7)  | 271.0608[M-H-SO <sub>3</sub> ] <sup>-</sup> , 177.0185[M-H-SO <sub>3</sub> -C <sub>6</sub> H <sub>6</sub> O] <sup>-</sup> , 151.0035[M-H-SO <sub>3</sub> -<br>C <sub>8</sub> H <sub>8</sub> O] <sup>-</sup> , 119.0508[M-H-SO <sub>3</sub> -C <sub>7</sub> H <sub>4</sub> O <sub>4</sub> ] <sup>-</sup> , 107.0150[M-H-SO <sub>3</sub> -C <sub>8</sub> H <sub>8</sub> O-CO <sub>2</sub> ] <sup>-</sup> ,<br>93.0356[M-H-SO <sub>3</sub> -C <sub>9</sub> H <sub>6</sub> O <sub>4</sub> ] <sup>-</sup> , 83.0149                                                                                                                                                                                                                                                                   | Urine |
| M10 | Naringenin- <i>O</i> -disulfate                      | C <sub>15</sub> H <sub>12</sub> O <sub>11</sub> S <sub>2</sub> | 12.2 | 430.9744<br>(-1.0) | 351.0169[M-H-SO <sub>3</sub> ] <sup>-</sup> , 271.0599[M-H-2SO <sub>3</sub> ] <sup>-</sup> , 177.0185[M-H-2SO <sub>3</sub> -<br>C <sub>6</sub> H <sub>6</sub> O] <sup>-</sup> , 151.0048[M-H-2SO <sub>3</sub> -C <sub>8</sub> H <sub>8</sub> O] <sup>-</sup> , 119.0507[M-H-2SO <sub>3</sub> -C <sub>7</sub> H <sub>4</sub> O <sub>4</sub> ] <sup>-</sup> ,<br>96.9621, 93.0341[M-H-2SO <sub>3</sub> -C <sub>9</sub> H <sub>6</sub> O <sub>4</sub> ] <sup>-</sup>                                                                                                                                                                                                                                                                                                                | Urine |
| M11 | Naringenin- <i>O</i> -glucuronide- <i>O</i> -sulfate | C <sub>21</sub> H <sub>20</sub> O <sub>14</sub> S              | 7.6  | 527.0483<br>(-3.3) | 447.0929[M-H-SO <sub>3</sub> ] <sup>-</sup> , 351.0202[M-H-GlcUA] <sup>-</sup> , 286.0708, 271.0599[M-H-<br>SO <sub>3</sub> -GlcUA] <sup>-</sup> , 175.0195[M-H-SO <sub>3</sub> -NE] <sup>-</sup> , 151.0062[M-H-SO <sub>3</sub> -GlcUA-<br>C <sub>8</sub> H <sub>8</sub> O] <sup>-</sup> , 113.0226[M-H-SO <sub>3</sub> -NE -CO <sub>2</sub> -H <sub>2</sub> O] <sup>-</sup> , 85.0328[M-H-SO <sub>3</sub> -NE -CO <sub>2</sub> -<br>H <sub>2</sub> O-CO] <sup>-</sup>                                                                                                                                                                                                                                                                                                          | Urine |
| M12 | Naringenin- <i>O</i> -glucuronide- <i>O</i> -sulfate | C <sub>21</sub> H <sub>20</sub> O <sub>14</sub> S              | 8.0  | 527.0491<br>(-1.9) | 447.0923[M-H-SO <sub>3</sub> ] <sup>-</sup> , 351.0170[M-H-GlcUA] <sup>-</sup> , 271.0604[M-H-SO <sub>3</sub> -<br>GlcUA] <sup>-</sup> , 177.0188[M-H-SO <sub>3</sub> -GlcUA-C <sub>6</sub> H <sub>6</sub> O] <sup>-</sup> , 175.0236[M-H-SO <sub>3</sub> -NE] <sup>-</sup> ,<br>151.0022[M-H-SO <sub>3</sub> -GlcUA-C <sub>8</sub> H <sub>8</sub> O] <sup>-</sup> , 113.0245[M-H-SO <sub>3</sub> -NE -CO <sub>2</sub> -H <sub>2</sub> O] <sup>-</sup> ,<br>96.9608, 85.0310[M-H-SO <sub>3</sub> -NE -CO <sub>2</sub> -H <sub>2</sub> O-CO] <sup>-</sup>                                                                                                                                                                                                                         | Urine |
| M13 | Naringenin- <i>O</i> -glucuronide- <i>O</i> -sulfate | C <sub>21</sub> H <sub>20</sub> O <sub>14</sub> S              | 8.9  | 527.0484<br>(-3.3) | 447.0945[M-H-SO <sub>3</sub> ] <sup>-</sup> , 351.0177[M-H-GlcUA] <sup>-</sup> , 313.0721[M-H-SO <sub>3</sub> -<br>C <sub>4</sub> H <sub>6</sub> O <sub>5</sub> ] <sup>-</sup> , 271.0605[M-H-SO <sub>3</sub> -GlcUA] <sup>-</sup> , 254.0707, 227.0710, 175.0243[M-<br>H-SO <sub>3</sub> -NE] <sup>-</sup> , 165.0182[M-H-SO <sub>3</sub> -GlcUA-C <sub>7</sub> H <sub>6</sub> O] <sup>-</sup> , 151.0022[M-H-SO <sub>3</sub> -<br>GlcUA-C <sub>8</sub> H <sub>8</sub> O] <sup>-</sup> , 119.0502[M-H-SO <sub>3</sub> -GlcUA-C <sub>7</sub> H <sub>4</sub> O <sub>4</sub> ] <sup>-</sup> , 113.0243[M-H-<br>SO <sub>3</sub> -NE -CO <sub>2</sub> -H <sub>2</sub> O] <sup>-</sup> , 96.9606, 85.0334[M-H-SO <sub>3</sub> -NE -CO <sub>2</sub> -H <sub>2</sub> O-CO] <sup>-</sup> | Urine |
| M14 | Naringenin- <i>O</i> -glucuronide- <i>O</i> -sulfate | C <sub>21</sub> H <sub>20</sub> O <sub>14</sub> S              | 10.1 | 527.0486<br>(-2.9) | 447.0936[M-H-SO <sub>3</sub> ] <sup>-</sup> , 351.0183[M-H-GlcUA] <sup>-</sup> , 271.0611[M-H-SO <sub>3</sub> -<br>GlcUA] <sup>-</sup> , 175.0253[M-H-SO <sub>3</sub> -NE] <sup>-</sup> , 151.0043[M-H-SO <sub>3</sub> -GlcUA-C <sub>8</sub> H <sub>8</sub> O] <sup>-</sup> ,<br>113.0258[M-H-SO <sub>3</sub> -NE -CO <sub>2</sub> -H <sub>2</sub> O] <sup>-</sup> , 85.0324[M-H-SO <sub>3</sub> -NE -CO <sub>2</sub> -H <sub>2</sub> O-                                                                                                                                                                                                                                                                                                                                         | Urine |

Supplementary Materials

|     |                                                        |                                                   |      |                    |                                                                                                                                                                                                                                                                                                                                                                                                                                                                                                                                                                  |                 |
|-----|--------------------------------------------------------|---------------------------------------------------|------|--------------------|------------------------------------------------------------------------------------------------------------------------------------------------------------------------------------------------------------------------------------------------------------------------------------------------------------------------------------------------------------------------------------------------------------------------------------------------------------------------------------------------------------------------------------------------------------------|-----------------|
|     |                                                        |                                                   |      |                    | CO] <sup>-</sup>                                                                                                                                                                                                                                                                                                                                                                                                                                                                                                                                                 |                 |
| M15 | Naringenin- <i>O</i> -glucoside- <i>O</i> -glucuronide | C <sub>27</sub> H <sub>30</sub> O <sub>16</sub>   | 8.8  | 609.1456<br>(-0.8) | 447.0935[M-H-Glc] <sup>-</sup> , 433.1141[M-H-GlcUA] <sup>-</sup> , 402.1669[M-H-Glc-COOH] <sup>-</sup> , 313.0712[M-H-Glc-C <sub>4</sub> H <sub>6</sub> O <sub>5</sub> ] <sup>-</sup> , 271.0594[M-H-Glc-GlcUA] <sup>-</sup> , 151.0000[M-H-Glc-GlcUA-C <sub>8</sub> H <sub>8</sub> O] <sup>-</sup> , 113.0237[M-H-Glc-NE-CO <sub>2</sub> -H <sub>2</sub> O] <sup>-</sup>                                                                                                                                                                                       | Urine           |
| M16 | Naringenin- <i>O</i> -glucoside- <i>O</i> -sulfate     | C <sub>21</sub> H <sub>22</sub> O <sub>13</sub> S | 9.0  | 513.0710<br>(0.4)  | 433.1135[M-H-SO <sub>3</sub> ] <sup>-</sup> , 358.9718, 313.0564[M-H-SO <sub>3</sub> -C <sub>4</sub> H <sub>8</sub> O <sub>4</sub> ] <sup>-</sup> , 271.0600[M-H-SO <sub>3</sub> -Glc] <sup>-</sup> , 151.0018[M-H-SO <sub>3</sub> -Glc-C <sub>8</sub> H <sub>8</sub> O] <sup>-</sup> , 119.0491[M-H-SO <sub>3</sub> -Glc-C <sub>7</sub> H <sub>4</sub> O <sub>4</sub> ] <sup>-</sup>                                                                                                                                                                            | Urine           |
| M17 | Naringenin- <i>O</i> -glucoside- <i>O</i> -sulfate     | C <sub>21</sub> H <sub>22</sub> O <sub>13</sub> S | 9.4  | 513.0703<br>(-1.1) | 433.1145[M-H-SO <sub>3</sub> ] <sup>-</sup> , 313.0560[M-H-SO <sub>3</sub> -C <sub>4</sub> H <sub>8</sub> O <sub>4</sub> ] <sup>-</sup> , 271.0603[M-H-SO <sub>3</sub> -Glc] <sup>-</sup> , 177.0197[M-H-SO <sub>3</sub> -Glc-C <sub>6</sub> H <sub>6</sub> O] <sup>-</sup> , 151.0030[M-H-SO <sub>3</sub> -Glc-C <sub>8</sub> H <sub>8</sub> O] <sup>-</sup> , 119.0500[M-H-SO <sub>3</sub> -Glc-C <sub>7</sub> H <sub>4</sub> O <sub>4</sub> ] <sup>-</sup> , 107.0137[M-H-SO <sub>3</sub> -Glc-C <sub>8</sub> H <sub>8</sub> O-CO <sub>2</sub> ] <sup>-</sup> | Urine           |
| M18 | Methylnaringenin- <i>O</i> -glucuronide                | C <sub>22</sub> H <sub>22</sub> O <sub>11</sub>   | 13.5 | 461.1087<br>(-0.4) | 443.1747[M-H-H <sub>2</sub> O] <sup>-</sup> , 285.0765[M-H-GlcUA] <sup>-</sup> , 175.0232[M-H-MNE] <sup>-</sup> , 164.0098, 151.0022[M-H-GlcUA-C <sub>9</sub> H <sub>10</sub> O] <sup>-</sup> , 113.0248[M-H-MNE-CO <sub>2</sub> -H <sub>2</sub> O] <sup>-</sup> , 96.9612, 85.0326[M-H-MNE-CO <sub>2</sub> -H <sub>2</sub> O-CO] <sup>-</sup>                                                                                                                                                                                                                   | Urine           |
| M19 | Apiferol                                               | C <sub>15</sub> H <sub>14</sub> O <sub>5</sub>    | 13.8 | 273.0765<br>(-1.2) | 167.0352, 153.0089[M-H-C <sub>8</sub> H <sub>8</sub> O] <sup>-</sup> , 123.0448, 119.0504[M-H-C <sub>7</sub> H <sub>6</sub> O <sub>4</sub> ] <sup>-</sup> , 93.0345[M-H-C <sub>9</sub> H <sub>8</sub> O <sub>4</sub> ] <sup>-</sup>                                                                                                                                                                                                                                                                                                                              | Urine           |
| M20 | Apigenin <sup>b</sup>                                  | C <sub>15</sub> H <sub>10</sub> O <sub>5</sub>    | 15.0 | 269.0455<br>(-0.3) | 251.1606[M-H-H <sub>2</sub> O] <sup>-</sup> , 225.1405, 151.0065[M-H-C <sub>8</sub> H <sub>6</sub> O] <sup>-</sup> , 117.0306[M-H-C <sub>7</sub> H <sub>4</sub> O <sub>4</sub> ] <sup>-</sup> , 98.9536[M-H-C <sub>7</sub> H <sub>4</sub> O <sub>4</sub> -H <sub>2</sub> O] <sup>-</sup>                                                                                                                                                                                                                                                                         | Urine,<br>Feces |
| M21 | Apigenin- <i>O</i> -glucuronide                        | C <sub>21</sub> H <sub>18</sub> O <sub>11</sub>   | 11.1 | 445.0772<br>(-1.0) | 269.0440[M-H-GlcUA] <sup>-</sup> , 175.0234[M-H-AE] <sup>-</sup> , 113.0242[M-H-AE-CO <sub>2</sub> -H <sub>2</sub> O] <sup>-</sup> , 96.9604, 85.0321[M-H-AE-CO <sub>2</sub> -H <sub>2</sub> O-CO] <sup>-</sup>                                                                                                                                                                                                                                                                                                                                                  | Urine           |
| M22 | Apigenin- <i>O</i> -glucuronide                        | C <sub>21</sub> H <sub>18</sub> O <sub>11</sub>   | 12.3 | 445.0778<br>(0.3)  | 269.0449[M-H-GlcUA] <sup>-</sup> , 175.0241[M-H-AE] <sup>-</sup> , 113.0240[M-H-AE-CO <sub>2</sub> -H <sub>2</sub> O] <sup>-</sup> , 96.9603, 85.0316[M-H-AE-CO <sub>2</sub> -H <sub>2</sub> O-CO] <sup>-</sup>                                                                                                                                                                                                                                                                                                                                                  | Urine           |
| M23 | Apigenin- <i>O</i> -sulfate                            | C <sub>15</sub> H <sub>10</sub> O <sub>8</sub> S  | 13.4 | 349.0024<br>(0.1)  | 269.0445[M-H-SO <sub>3</sub> ] <sup>-</sup> , 117.0350[M-H-SO <sub>3</sub> -C <sub>7</sub> H <sub>4</sub> O <sub>4</sub> ] <sup>-</sup> , 96.9609                                                                                                                                                                                                                                                                                                                                                                                                                | Urine           |
| M24 | Eriodictyol <sup>b</sup>                               | C <sub>15</sub> H <sub>12</sub> O <sub>6</sub>    | 12.7 | 287.0558<br>(-1.2) | 225.0700, 201.1115, 175.0711, 151.0041[M-H-C <sub>8</sub> H <sub>8</sub> O <sub>2</sub> ] <sup>-</sup> , 135.0456[M-H-C <sub>7</sub> H <sub>4</sub> O <sub>4</sub> ] <sup>-</sup> , 107.0130[M-H-C <sub>8</sub> H <sub>8</sub> O <sub>2</sub> -CO <sub>2</sub> ] <sup>-</sup>                                                                                                                                                                                                                                                                                    | Urine,<br>Feces |
| M25 | Eriodictyol- <i>O</i> -glucuronide                     | C <sub>21</sub> H <sub>20</sub> O <sub>12</sub>   | 10.5 | 463.0865           | 383.1953, 287.0555[M-H-GlcUA] <sup>-</sup> , 175.0246[M-H-EY] <sup>-</sup> , 151.0033[M-H-                                                                                                                                                                                                                                                                                                                                                                                                                                                                       | Urine           |

Supplementary Materials

|     |                                                       |                                                   |      |          |                                                                                                                                                                                                                                                                                                                                                                                                                                                                                                                                                                                                                                                                                                       |       |
|-----|-------------------------------------------------------|---------------------------------------------------|------|----------|-------------------------------------------------------------------------------------------------------------------------------------------------------------------------------------------------------------------------------------------------------------------------------------------------------------------------------------------------------------------------------------------------------------------------------------------------------------------------------------------------------------------------------------------------------------------------------------------------------------------------------------------------------------------------------------------------------|-------|
|     |                                                       |                                                   |      | (-3.7)   | GlcUA-C <sub>8</sub> H <sub>8</sub> O <sub>2</sub> ] <sup>-</sup> , 135.0448[M-H-GlcUA-C <sub>7</sub> H <sub>4</sub> O <sub>4</sub> ] <sup>-</sup> , 113.0251[M-H-EY-CO <sub>2</sub> -H <sub>2</sub> O] <sup>-</sup> , 107.0144[M-H-GlcUA-C <sub>8</sub> H <sub>8</sub> O <sub>2</sub> -CO <sub>2</sub> ] <sup>-</sup> , 85.0321[M-H-EY-CO <sub>2</sub> -H <sub>2</sub> O-CO] <sup>-</sup>                                                                                                                                                                                                                                                                                                            |       |
| M26 | Eriodictyol- <i>O</i> -glucuronide                    | C <sub>21</sub> H <sub>20</sub> O <sub>12</sub>   | 11.5 | 463.0884 | 287.0528[M-H-GlcUA] <sup>-</sup> , 151.0024[M-H-GlcUA-C <sub>8</sub> H <sub>8</sub> O <sub>2</sub> ] <sup>-</sup> , 113.0260[M-H-EY-CO <sub>2</sub> -H <sub>2</sub> O] <sup>-</sup>                                                                                                                                                                                                                                                                                                                                                                                                                                                                                                                   | Urine |
| M27 | Eriodictyol- <i>O</i> -sulfate                        | C <sub>15</sub> H <sub>12</sub> O <sub>9</sub> S  | 11.2 | 367.0127 | 287.0551[M-H-SO <sub>3</sub> ] <sup>-</sup> , 151.0038[M-H-SO <sub>3</sub> -C <sub>8</sub> H <sub>8</sub> O <sub>2</sub> ] <sup>-</sup> , 135.0419[M-H-SO <sub>3</sub> -C <sub>7</sub> H <sub>4</sub> O <sub>4</sub> ] <sup>-</sup> , 96.9621                                                                                                                                                                                                                                                                                                                                                                                                                                                         | Urine |
| M28 | Eriodictyol- <i>O</i> -sulfate                        | C <sub>15</sub> H <sub>12</sub> O <sub>9</sub> S  | 12.3 | 367.0127 | 287.0542[M-H-SO <sub>3</sub> ] <sup>-</sup> , 151.0023[M-H-SO <sub>3</sub> -C <sub>8</sub> H <sub>8</sub> O <sub>2</sub> ] <sup>-</sup> , 135.0442[M-H-SO <sub>3</sub> -C <sub>7</sub> H <sub>4</sub> O <sub>4</sub> ] <sup>-</sup> , 107.0165[M-H-SO <sub>3</sub> -C <sub>8</sub> H <sub>8</sub> O <sub>2</sub> -CO <sub>2</sub> ] <sup>-</sup>                                                                                                                                                                                                                                                                                                                                                      | Urine |
| M29 | Eriodictyol- <i>O</i> -glucuronide- <i>O</i> -sulfate | C <sub>21</sub> H <sub>20</sub> O <sub>15</sub> S | 9.9  | 543.0446 | 463.0877[M-H-SO <sub>3</sub> ] <sup>-</sup> , 367.0121[M-H-GlcUA] <sup>-</sup> , 287.0553[M-H-SO <sub>3</sub> -GlcUA] <sup>-</sup> , 254.9802, 175.0235[M-H-SO <sub>3</sub> -EY] <sup>-</sup> , 151.0034[M-H-SO <sub>3</sub> -GlcUA-C <sub>8</sub> H <sub>8</sub> O <sub>2</sub> ] <sup>-</sup> , 135.0455[M-H-SO <sub>3</sub> -GlcUA-C <sub>7</sub> H <sub>4</sub> O <sub>4</sub> ] <sup>-</sup> , 113.0250[M-H-SO <sub>3</sub> -EY-CO <sub>2</sub> -H <sub>2</sub> O] <sup>-</sup> , 107.0125[M-H-SO <sub>3</sub> -GlcUA-C <sub>8</sub> H <sub>8</sub> O <sub>2</sub> -CO <sub>2</sub> ] <sup>-</sup> , 95.0149, 85.0310[M-H-SO <sub>3</sub> -EY-CO <sub>2</sub> -H <sub>2</sub> O-CO] <sup>-</sup> | Urine |
| M30 | Hesperetin <sup>b</sup>                               | C <sub>16</sub> H <sub>14</sub> O <sub>6</sub>    | 13.8 | 301.0720 | 286.0501[M-H-CH <sub>3</sub> ] <sup>-</sup> , 177.0177[M-H-C <sub>7</sub> H <sub>8</sub> O <sub>2</sub> ] <sup>-</sup> , 151.0034[M-H-C <sub>9</sub> H <sub>10</sub> O <sub>2</sub> ] <sup>-</sup> , 134.0372, 107.0132[M-H-C <sub>9</sub> H <sub>10</sub> O <sub>2</sub> -CO <sub>2</sub> ] <sup>-</sup> , 95.0889, 83.0146                                                                                                                                                                                                                                                                                                                                                                          | Urine |
| M31 | Hesperetin-5- <i>O</i> -glucuronide                   | C <sub>22</sub> H <sub>22</sub> O <sub>12</sub>   | 11.6 | 477.1034 | 301.0716[M-H-GlcUA] <sup>-</sup> , 286.0470[M-H-GlcUA-CH <sub>3</sub> ] <sup>-</sup> , 177.0186[M-H-GlcUA-C <sub>7</sub> H <sub>8</sub> O <sub>2</sub> ] <sup>-</sup> , 175.0236[M-H-HE] <sup>-</sup> , 151.0029[M-H-GlcUA-C <sub>9</sub> H <sub>10</sub> O <sub>2</sub> ] <sup>-</sup> , 134.0365[M-H-GlcUA-C <sub>7</sub> H <sub>4</sub> O <sub>4</sub> -CH <sub>3</sub> ] <sup>-</sup> , 113.0243[M-H-HE-CO <sub>2</sub> -H <sub>2</sub> O] <sup>-</sup> , 99.0102, 85.0286[M-H-HE-CO <sub>2</sub> -H <sub>2</sub> O-CO] <sup>-</sup>                                                                                                                                                              | Urine |
| M32 | Hesperetin-7- <i>O</i> -glucuronide <sup>b</sup>      | C <sub>22</sub> H <sub>22</sub> O <sub>12</sub>   | 11.8 | 477.1040 | 301.0719[M-H-GlcUA] <sup>-</sup> , 286.0477[M-H-GlcUA-CH <sub>3</sub> ] <sup>-</sup> , 242.0552[M-H-GlcUA-OCH <sub>2</sub> -HCO] <sup>-</sup> , 175.0240[M-H-HE] <sup>-</sup> , 151.0026[M-H-GlcUA-C <sub>9</sub> H <sub>10</sub> O <sub>2</sub> ] <sup>-</sup> , 113.0244[M-H-HE-CO <sub>2</sub> -H <sub>2</sub> O] <sup>-</sup> , 95.0146, 85.0315[M-H-HE-CO <sub>2</sub> -H <sub>2</sub> O-CO] <sup>-</sup>                                                                                                                                                                                                                                                                                        | Urine |
| M33 | Hesperetin-3'- <i>O</i> -glucuronide <sup>b</sup>     | C <sub>22</sub> H <sub>22</sub> O <sub>12</sub>   | 12.4 | 477.1041 | 360.9595, 301.0702[M-H-GlcUA] <sup>-</sup> , 286.0452[M-H-GlcUA-CH <sub>3</sub> ] <sup>-</sup> , 151.0030[M-H-GlcUA-C <sub>9</sub> H <sub>10</sub> O <sub>2</sub> ] <sup>-</sup> , 113.0248[M-H-HE-CO <sub>2</sub> -H <sub>2</sub> O] <sup>-</sup>                                                                                                                                                                                                                                                                                                                                                                                                                                                    | Urine |



Supplementary Materials

|     |                                                      |                                                   |      |                    |                                                                                                                                                                                                                                                                                                                                                                                                                                                                                                                                |       |
|-----|------------------------------------------------------|---------------------------------------------------|------|--------------------|--------------------------------------------------------------------------------------------------------------------------------------------------------------------------------------------------------------------------------------------------------------------------------------------------------------------------------------------------------------------------------------------------------------------------------------------------------------------------------------------------------------------------------|-------|
| M34 | Hesperetin- <i>O</i> -diglucuronide                  | C <sub>28</sub> H <sub>30</sub> O <sub>18</sub>   | 9.6  | 653.1362<br>(0.4)  | 477.1007[M-H-GlcUA] <sup>-</sup> , 301.0702[M-H-2GlcUA] <sup>-</sup> , 175.0221[M-H-HE-GlcUA] <sup>-</sup> , 151.0018[M-H-2GlcUA-C <sub>9</sub> H <sub>10</sub> O <sub>2</sub> ] <sup>-</sup> , 113.0238[M-H-HE-GlcUA-CO <sub>2</sub> -H <sub>2</sub> O] <sup>-</sup> , 85.0315[M-H-HE-GlcUA-CO <sub>2</sub> -H <sub>2</sub> O-CO] <sup>-</sup>                                                                                                                                                                                | Urine |
| M35 | Hesperetin-3'- <i>O</i> -sulfate                     | C <sub>16</sub> H <sub>14</sub> O <sub>9</sub> S  | 11.9 | 381.0282<br>(-0.9) | 301.0706[M-H-SO <sub>3</sub> ] <sup>-</sup> , 286.0464[M-H-SO <sub>3</sub> -CH <sub>3</sub> ] <sup>-</sup> , 205.0829, 165.9884[M-H-SO <sub>3</sub> -C <sub>8</sub> H <sub>8</sub> O <sub>2</sub> ] <sup>-</sup> , 110.0009                                                                                                                                                                                                                                                                                                    | Urine |
| M36 | Hesperetin-7- <i>O</i> -sulfate <sup>b</sup>         | C <sub>16</sub> H <sub>14</sub> O <sub>9</sub> S  | 12.3 | 381.0279<br>(-1.7) | 301.0716[M-H-SO <sub>3</sub> ] <sup>-</sup> , 286.0478[M-H-SO <sub>3</sub> -CH <sub>3</sub> ] <sup>-</sup> , 177.0177[M-H-SO <sub>3</sub> -C <sub>7</sub> H <sub>8</sub> O <sub>2</sub> ] <sup>-</sup> , 151.0038[M-H-SO <sub>3</sub> -C <sub>9</sub> H <sub>10</sub> O <sub>2</sub> ] <sup>-</sup> , 134.0377[M-H-SO <sub>3</sub> -C <sub>7</sub> H <sub>4</sub> O <sub>4</sub> -CH <sub>3</sub> ] <sup>-</sup> , 107.0136[M-H-SO <sub>3</sub> -C <sub>9</sub> H <sub>10</sub> O <sub>2</sub> -CO <sub>2</sub> ] <sup>-</sup> | Urine |
| M37 | Hesperetin- <i>O</i> -glucuronide- <i>O</i> -sulfate | C <sub>22</sub> H <sub>22</sub> O <sub>15</sub> S | 9.4  | 557.0579<br>(-4.9) | 477.1032[M-H-SO <sub>3</sub> ] <sup>-</sup> , 383.1930, 381.0252[M-H-GlcUA] <sup>-</sup> , 301.0719[M-H-GlcUA-SO <sub>3</sub> ] <sup>-</sup> , 254.9808, 175.0258[M-H-SO <sub>3</sub> -HE] <sup>-</sup> , 151.0022[M-H-GlcUA-SO <sub>3</sub> -C <sub>9</sub> H <sub>10</sub> O <sub>2</sub> ] <sup>-</sup> , 113.0221[M-H-SO <sub>3</sub> -HE-CO <sub>2</sub> -H <sub>2</sub> O] <sup>-</sup>                                                                                                                                  | Urine |
| M38 | Hesperetin- <i>O</i> -glucuronide- <i>O</i> -sulfate | C <sub>22</sub> H <sub>22</sub> O <sub>15</sub> S | 10.3 | 557.0597<br>(-1.8) | 477.1038[M-H-SO <sub>3</sub> ] <sup>-</sup> , 381.0272[M-H-GlcUA] <sup>-</sup> , 301.0718[M-H-GlcUA-SO <sub>3</sub> ] <sup>-</sup> , 254.9800, 175.0236[M-H-SO <sub>3</sub> -HE] <sup>-</sup> , 151.0035[M-H-GlcUA-SO <sub>3</sub> -C <sub>9</sub> H <sub>10</sub> O <sub>2</sub> ] <sup>-</sup> , 113.0247[M-H-SO <sub>3</sub> -HE-CO <sub>2</sub> -H <sub>2</sub> O] <sup>-</sup> , 85.0309[M-H-SO <sub>3</sub> -HE-CO <sub>2</sub> -H <sub>2</sub> O-CO] <sup>-</sup>                                                       | Urine |
| M39 | Hesperetin- <i>O</i> -glucoside- <i>O</i> -sulfate   | C <sub>22</sub> H <sub>24</sub> O <sub>14</sub> S | 9.4  | 543.0805<br>(-1.6) | 463.1235[M-H-SO <sub>3</sub> ] <sup>-</sup> , 383.1926, 301.0705[M-H-SO <sub>3</sub> -Glc] <sup>-</sup> , 287.0521, 151.0010[M-H-SO <sub>3</sub> -Glc-C <sub>9</sub> H <sub>10</sub> O <sub>2</sub> ] <sup>-</sup> , 113.0248                                                                                                                                                                                                                                                                                                  | Urine |

<sup>a</sup> The losses are: Rha= rhamnose moiety, Glc = glucose moiety, GlcUA = glucuronyl moiety, NE = naringenin, AE=apigenin, EY = eriodictyol, HE = hesperetin.

<sup>b</sup> Confirmation in comparison with authentic standards.

Supplementary Materials

Table S4. UFLC-Q-TOF-MS/MS based identifications of phenolic catabolites in rat urine and feces samples collected 0-48 h after a single oral administration of naringin.

| No. | Identified metabolites                                          | Formula                                          | RT<br>(min) | [M-H] <sup>-</sup><br>(Error, ppm) | Fragment ions in negative mode <sup>a</sup>                                                                                                                                                                                                                                                                                                                                                                                                                         | Source |
|-----|-----------------------------------------------------------------|--------------------------------------------------|-------------|------------------------------------|---------------------------------------------------------------------------------------------------------------------------------------------------------------------------------------------------------------------------------------------------------------------------------------------------------------------------------------------------------------------------------------------------------------------------------------------------------------------|--------|
| C1  | Chromone derivatives                                            |                                                  |             |                                    |                                                                                                                                                                                                                                                                                                                                                                                                                                                                     |        |
|     | 5,7-Dihydroxychromone <sup>b</sup>                              | C <sub>9</sub> H <sub>6</sub> O <sub>4</sub>     | 9.4         | 177.0206<br>(4.9)                  | 133.0272[M-H-CO <sub>2</sub> ] <sup>-</sup> , 109.0286, 91.0186, 77.0405                                                                                                                                                                                                                                                                                                                                                                                            | Urine  |
| C2  | Benzenetriol derivatives                                        |                                                  |             |                                    |                                                                                                                                                                                                                                                                                                                                                                                                                                                                     |        |
|     | Phloroglucinol <sup>b</sup>                                     | C <sub>6</sub> H <sub>6</sub> O <sub>3</sub>     | 6.7         | 125.0255<br>(3.5)                  | 81.0315[M-H-CO <sub>2</sub> ] <sup>-</sup>                                                                                                                                                                                                                                                                                                                                                                                                                          | Urine  |
| C3  | Phloroglucinol- <i>O</i> -sulfate                               | C <sub>6</sub> H <sub>6</sub> O <sub>6</sub> S   | 6.7         | 204.9814<br>(0.8)                  | 125.0235[M-H-SO <sub>3</sub> ] <sup>-</sup> , 81.0360[M-H-SO <sub>3</sub> -CO <sub>2</sub> ] <sup>-</sup>                                                                                                                                                                                                                                                                                                                                                           | Urine  |
| C4  | Phenylpropenoic acid derivatives                                |                                                  |             |                                    |                                                                                                                                                                                                                                                                                                                                                                                                                                                                     |        |
|     | Feruloylglycine                                                 | C <sub>12</sub> H <sub>13</sub> NO <sub>5</sub>  | 9.6         | 250.0722<br>(0.2)                  | 232.0602[M-H-H <sub>2</sub> O] <sup>-</sup> , 206.0811[M-H-CO <sub>2</sub> ] <sup>-</sup> , 188.0736[M-H-H <sub>2</sub> O-CO <sub>2</sub> ] <sup>-</sup> ,<br>162.0913[M-H-CO <sub>2</sub> -CH <sub>4</sub> -CO] <sup>-</sup> , 132.0309[M-H-CO <sub>2</sub> -C <sub>2</sub> H <sub>4</sub> NO-CH <sub>4</sub> ] <sup>-</sup> ,<br>121.0295, 88.0403                                                                                                                | Urine  |
| C5  | 3-(4'-Methoxyphenyl)-2-propenoic acid-3'- <i>O</i> -glucuronide | C <sub>16</sub> H <sub>18</sub> O <sub>10</sub>  | 8.3         | 369.0827<br>(0.1)                  | 324.0246[M-H-COOH] <sup>-</sup> , 289.9186, 251.1105, 193.0496[M-H-GlcUA] <sup>-</sup> ,<br>178.0256[M-H-GlcUA-CH <sub>3</sub> ] <sup>-</sup> , 175.0233[M-H-3H4MPEA] <sup>-</sup> , 149.0590[M-H-<br>GlcUA-CO <sub>2</sub> ] <sup>-</sup> , 134.0360[M-H-GlcUA-CO <sub>2</sub> -CH <sub>3</sub> ] <sup>-</sup> , 113.0228[M-H-<br>3H4MPEA-CO <sub>2</sub> -H <sub>2</sub> O] <sup>-</sup> , 85.0293[M-H-3H4MPEA-CO <sub>2</sub> -H <sub>2</sub> O-CO] <sup>-</sup> | Urine  |
| C6  | 3-(4'-Methoxyphenyl)-2-propenoic acid-3'- <i>O</i> -sulfate     | C <sub>10</sub> H <sub>10</sub> O <sub>7</sub> S | 8.8         | 273.0077<br>(0.9)                  | 229.0146[M-H-CO <sub>2</sub> ] <sup>-</sup> , 193.0496[M-H-SO <sub>3</sub> ] <sup>-</sup> , 178.0260[M-H-SO <sub>3</sub> -CH <sub>3</sub> ] <sup>-</sup> ,<br>149.0597[M-H-SO <sub>3</sub> -CO <sub>2</sub> ] <sup>-</sup> , 134.0364[M-H-SO <sub>3</sub> -CO <sub>2</sub> -CH <sub>3</sub> ] <sup>-</sup> , 96.9602                                                                                                                                                | Urine  |
| C7  | Caffeic acid-4'- <i>O</i> -sulfate                              | C <sub>9</sub> H <sub>8</sub> O <sub>7</sub> S   | 5.2         | 258.9924<br>(2.3)                  | 214.9990[M-H-CO <sub>2</sub> ] <sup>-</sup> , 187.0061[M-H-CO <sub>2</sub> -CO] <sup>-</sup> , 179.0322[M-H-SO <sub>3</sub> ] <sup>-</sup> ,<br>135.0429[M-H-SO <sub>3</sub> -CO <sub>2</sub> ] <sup>-</sup> , 107.0492[M-H-SO <sub>3</sub> -CO <sub>2</sub> -CO] <sup>-</sup> , 93.0352,<br>80.9649                                                                                                                                                                | Urine  |
| C8  | Caffeic acid-3'- <i>O</i> -sulfate                              | C <sub>9</sub> H <sub>8</sub> O <sub>7</sub> S   | 5.7         | 258.9922<br>(1.7)                  | 215.0004[M-H-CO <sub>2</sub> ] <sup>-</sup> , 187.0068[M-H-CO <sub>2</sub> -CO] <sup>-</sup> , 179.0330[M-H-SO <sub>3</sub> ] <sup>-</sup> ,<br>135.0446[M-H-SO <sub>3</sub> -CO <sub>2</sub> ] <sup>-</sup> , 107.0505[M-H-SO <sub>3</sub> -CO <sub>2</sub> -CO] <sup>-</sup> , 93.0353                                                                                                                                                                            | Urine  |

Supplementary Materials

|     |                                                          |                                                  |      |                    |                                                                                                                                                                                                                                                                                                                                       |                 |
|-----|----------------------------------------------------------|--------------------------------------------------|------|--------------------|---------------------------------------------------------------------------------------------------------------------------------------------------------------------------------------------------------------------------------------------------------------------------------------------------------------------------------------|-----------------|
| C9  | Caffeic acid- <i>O</i> -glucuronide                      | C <sub>15</sub> H <sub>16</sub> O <sub>10</sub>  | 5.3  | 355.0665<br>(-1.5) | 283.0792, 179.0340[M-H-GlcUA] <sup>-</sup> , 175.0272[M-H-CA] <sup>-</sup> , 113.0257[M-H-CA-CO <sub>2</sub> -H <sub>2</sub> O] <sup>-</sup> , 107.0467[M-H-GlcUA-CO <sub>2</sub> -CO] <sup>-</sup> , 85.0315[M-H-CA-CO <sub>2</sub> -H <sub>2</sub> O-CO] <sup>-</sup>                                                               | Urine           |
| C10 | 3-(4'-Hydroxyphenyl)-2-propenoic acid                    | C <sub>9</sub> H <sub>8</sub> O <sub>3</sub>     | 10.9 | 163.0408<br>(4.2)  | 119.0494[M-H-CO <sub>2</sub> ] <sup>-</sup> , 93.0356[M-H-CO <sub>2</sub> -2CH] <sup>-</sup>                                                                                                                                                                                                                                          | Urine,<br>Feces |
| C11 | 3-(3'-Hydroxyphenyl)-2-propenoic acid                    | C <sub>9</sub> H <sub>8</sub> O <sub>3</sub>     | 11.5 | 163.0410<br>(4.6)  | 119.0500[M-H-CO <sub>2</sub> ] <sup>-</sup> , 93.0325[M-H-CO <sub>2</sub> -2CH] <sup>-</sup> , 91.0572[M-H-CO <sub>2</sub> -CO] <sup>-</sup>                                                                                                                                                                                          | Urine           |
| C12 | 3-(Phenyl)-2-propenoic acid-4'- <i>O</i> -sulfate        | C <sub>9</sub> H <sub>8</sub> O <sub>6</sub> S   | 8.6  | 242.9971<br>(0.9)  | 163.0401[M-H-SO <sub>3</sub> ] <sup>-</sup> , 119.0509[M-H-SO <sub>3</sub> -CO <sub>2</sub> ] <sup>-</sup> , 96.9618, 91.0521[M-H-SO <sub>3</sub> -CO <sub>2</sub> -CO] <sup>-</sup>                                                                                                                                                  | Urine           |
| C13 | 3-(Phenyl)-2-propenoic acid-3'- <i>O</i> -sulfate        | C <sub>9</sub> H <sub>8</sub> O <sub>6</sub> S   | 9.4  | 242.9970<br>(0.6)  | 163.0391[M-H-SO <sub>3</sub> ] <sup>-</sup> , 119.0498[M-H-SO <sub>3</sub> -CO <sub>2</sub> ] <sup>-</sup> , 91.0565[M-H-SO <sub>3</sub> -CO <sub>2</sub> -CO] <sup>-</sup>                                                                                                                                                           | Urine           |
| C14 | 3-(Phenyl)-2-propenoic acid-4'- <i>O</i> -glucuronide    | C <sub>15</sub> H <sub>16</sub> O <sub>9</sub>   | 9.4  | 339.0724<br>(0.7)  | 175.0217[M-H-4HPEA] <sup>-</sup> , 163.0587[M-H-GlcUA] <sup>-</sup> , 119.0505[M-H-GlcUA-CO <sub>2</sub> ] <sup>-</sup> , 113.0244[M-H-4HPEA-CO <sub>2</sub> -H <sub>2</sub> O] <sup>-</sup> , 85.0304[M-H-4HPEA-CO <sub>2</sub> -H <sub>2</sub> O-CO] <sup>-</sup>                                                                   | Urine           |
| C15 | 3-(Phenyl)-2-propenoic acid-3'- <i>O</i> -glucuronide    | C <sub>15</sub> H <sub>16</sub> O <sub>9</sub>   | 10.4 | 339.0718<br>(-0.9) | 175.0237[M-H-3HPEA] <sup>-</sup> , 163.0390[M-H-GlcUA] <sup>-</sup> , 119.0503[M-H-GlcUA-CO <sub>2</sub> ] <sup>-</sup> , 113.0247[M-H-3HPEA-CO <sub>2</sub> -H <sub>2</sub> O] <sup>-</sup> , 103.0062, 85.0305[M-H-3HPEA-CO <sub>2</sub> -H <sub>2</sub> O-CO] <sup>-</sup>                                                         | Urine           |
|     | Phenylpropionic acid derivatives                         |                                                  |      |                    |                                                                                                                                                                                                                                                                                                                                       |                 |
| C16 | 3-(3'-Hydroxy-4'-methoxyphenyl)hydracrylic acid          | C <sub>10</sub> H <sub>12</sub> O <sub>5</sub>   | 11.6 | 211.0613<br>(0.6)  | 193.0496[M-H-H <sub>2</sub> O] <sup>-</sup> , 167.0699[M-H-CO <sub>2</sub> ] <sup>-</sup> , 123.0809[M-H-CO <sub>2</sub> -C <sub>2</sub> H <sub>4</sub> O] <sup>-</sup> , 95.0523[M-H-CO <sub>2</sub> -C <sub>2</sub> H <sub>4</sub> O-CO] <sup>-</sup>                                                                               | Urine,<br>Feces |
| C17 | 3-(3'-Hydroxy-4'-methoxyphenyl)propionic acid            | C <sub>10</sub> H <sub>12</sub> O <sub>4</sub>   | 12.0 | 195.0667<br>(2.1)  | 160.8426, 151.0739[M-H-CO <sub>2</sub> ] <sup>-</sup> , 123.0403[M-H-CO <sub>2</sub> -CO] <sup>-</sup> , 107.0847[M-H-CO <sub>2</sub> -CO-CH <sub>4</sub> ] <sup>-</sup>                                                                                                                                                              | Urine,<br>Feces |
| C18 | 3-(4'-Methoxyphenyl)propionic acid-3'- <i>O</i> -sulfate | C <sub>10</sub> H <sub>12</sub> O <sub>7</sub> S | 8.2  | 275.0230<br>(-0.4) | 195.0650[M-H-SO <sub>3</sub> ] <sup>-</sup> , 177.0547[M-H-SO <sub>3</sub> -H <sub>2</sub> O] <sup>-</sup> , 151.0786[M-H-SO <sub>3</sub> -CO <sub>2</sub> ] <sup>-</sup> , 133.0646[M-H-SO <sub>3</sub> -CO <sub>2</sub> -H <sub>2</sub> O] <sup>-</sup> , 123.0445[M-H-SO <sub>3</sub> -CO <sub>2</sub> -CO] <sup>-</sup> , 81.0360 | Urine,<br>Feces |
| C19 | 3-(4'-Methoxyphenyl)propionic                            | C <sub>16</sub> H <sub>20</sub> O <sub>10</sub>  | 10.6 | 371.0965           | 327.1336[M-H-CO <sub>2</sub> ] <sup>-</sup> , 283.0813[M-H-2CO <sub>2</sub> ] <sup>-</sup> , 241.9922, 195.0606[M-H-                                                                                                                                                                                                                  | Urine           |

Supplementary Materials

|     |                                                              |                                                 |      |                    |                                                                                                                                                                                                                                                                                                                                                       |                 |
|-----|--------------------------------------------------------------|-------------------------------------------------|------|--------------------|-------------------------------------------------------------------------------------------------------------------------------------------------------------------------------------------------------------------------------------------------------------------------------------------------------------------------------------------------------|-----------------|
|     | acid-3'- <i>O</i> -glucuronide                               |                                                 |      | (-5.0)             | GlcUA] <sup>-</sup> , 175.0255[M-H-3H4MPPA] <sup>-</sup> , 151.0760[M-H-GlcUA-CO <sub>2</sub> ] <sup>-</sup> , 113.0249[M-H-3H4MPPA-CO <sub>2</sub> -H <sub>2</sub> O] <sup>-</sup> , 96.9640, 85.0303[M-H-3H4MPPA-CO <sub>2</sub> -H <sub>2</sub> O-CO] <sup>-</sup>                                                                                 |                 |
| C20 | 3-(3',4'-Dihydroxyphenyl)propionic acid                      | C <sub>9</sub> H <sub>10</sub> O <sub>4</sub>   | 7.9  | 181.0507<br>(0.3)  | 163.0384[M-H-H <sub>2</sub> O] <sup>-</sup> , 135.0431[M-H-H <sub>2</sub> O-CO] <sup>-</sup> , 119.0493[M-H-H <sub>2</sub> O-CO <sub>2</sub> ] <sup>-</sup> , 107.0482[M-H-H <sub>2</sub> O-2CO] <sup>-</sup> , 93.0368                                                                                                                               | Urine,<br>Feces |
| C21 | 3-(3'-Hydroxyphenyl)propionic acid-4'- <i>O</i> -sulfate     | C <sub>9</sub> H <sub>10</sub> O <sub>7</sub> S | 7.0  | 261.0074<br>(-0.3) | 217.0180[M-H-CO <sub>2</sub> ] <sup>-</sup> , 181.0498[M-H-SO <sub>3</sub> ] <sup>-</sup> , 137.0607[M-H-SO <sub>3</sub> -CO <sub>2</sub> ] <sup>-</sup> , 122.0372[M-H-SO <sub>3</sub> -CO <sub>2</sub> -CH <sub>3</sub> ] <sup>-</sup> , 95.0508, 79.9577                                                                                           | Urine,<br>Feces |
| C22 | 3-(4'-Hydroxyphenyl)propionic acid-3'- <i>O</i> -sulfate     | C <sub>9</sub> H <sub>10</sub> O <sub>7</sub> S | 8.0  | 261.0077<br>(0.8)  | 181.0495[M-H-SO <sub>3</sub> ] <sup>-</sup> , 137.0600[M-H-SO <sub>3</sub> -CO <sub>2</sub> ] <sup>-</sup> , 135.0446[M-H-SO <sub>3</sub> -HCOOH] <sup>-</sup> , 121.0287[M-H-SO <sub>3</sub> -CO <sub>2</sub> -CH <sub>4</sub> ] <sup>-</sup> , 109.0282[M-H-SO <sub>3</sub> -CO <sub>2</sub> -CO] <sup>-</sup> , 79.9578                            | Urine           |
| C23 | 3-(3'-Hydroxyphenyl)propionic acid-4'- <i>O</i> -glucuronide | C <sub>15</sub> H <sub>18</sub> O <sub>10</sub> | 6.0  | 357.0825<br>(-0.5) | 181.0486[M-H-GlcUA] <sup>-</sup> , 175.0261[M-H-3H4HPPA] <sup>-</sup> , 137.0596[M-H-GlcUA-CO <sub>2</sub> ] <sup>-</sup> , 113.0236[M-H-3H4HPPA-CO <sub>2</sub> -H <sub>2</sub> O] <sup>-</sup> , 85.0312[M-H-3H4HPPA-CO <sub>2</sub> -H <sub>2</sub> O-CO] <sup>-</sup>                                                                             | Urine,<br>Feces |
| C24 | 3-(4'-Hydroxyphenyl)propionic acid-3'- <i>O</i> -glucuronide | C <sub>15</sub> H <sub>18</sub> O <sub>10</sub> | 6.7  | 357.0825<br>(-0.7) | 181.0491[M-H-GlcUA] <sup>-</sup> , 175.0258[M-H-3H4HPPA] <sup>-</sup> , 137.0587[M-H-GlcUA-CO <sub>2</sub> ] <sup>-</sup> , 135.0461[M-H-GlcUA-HCOOH] <sup>-</sup> , 113.0238[M-H-3H4HPPA-CO <sub>2</sub> -H <sub>2</sub> O] <sup>-</sup> , 85.0317[M-H-3H4HPPA-CO <sub>2</sub> -H <sub>2</sub> O-CO] <sup>-</sup>                                    | Urine,<br>Feces |
| C25 | 3-(4'-Hydroxyphenyl)propionic acid <sup>b</sup>              | C <sub>9</sub> H <sub>10</sub> O <sub>3</sub>   | 10.2 | 165.0572<br>(4.2)  | 121.0634[M-H-CO <sub>2</sub> ] <sup>-</sup> , 119.0510[M-H-HCOOH] <sup>-</sup> , 93.0358[M-H-CO <sub>2</sub> -C <sub>2</sub> H <sub>4</sub> ] <sup>-</sup>                                                                                                                                                                                            | Urine,<br>Feces |
| C26 | 3-(3'-Hydroxyphenyl)propionic acid                           | C <sub>9</sub> H <sub>10</sub> O <sub>3</sub>   | 10.8 | 165.0573<br>(4.4)  | 121.0662[M-H-CO <sub>2</sub> ] <sup>-</sup> , 119.0507[M-H-HCOOH] <sup>-</sup> , 106.0429[M-H-CO <sub>2</sub> -CH <sub>3</sub> ] <sup>-</sup> , 93.0356[M-H-CO <sub>2</sub> -C <sub>2</sub> H <sub>4</sub> ] <sup>-</sup>                                                                                                                             | Urine,<br>Feces |
| C27 | 3-(Phenyl)propionic acid-4'- <i>O</i> -sulfate               | C <sub>9</sub> H <sub>10</sub> O <sub>6</sub> S | 8.3  | 245.0139<br>(5.4)  | 165.0550[M-H-SO <sub>3</sub> ] <sup>-</sup> , 121.0659[M-H-SO <sub>3</sub> -CO <sub>2</sub> ] <sup>-</sup> , 119.0504[M-H-SO <sub>3</sub> -HCOOH] <sup>-</sup> , 93.0360[M-H-SO <sub>3</sub> -CO <sub>2</sub> -C <sub>2</sub> H <sub>4</sub> ] <sup>-</sup> , 79.9596                                                                                 | Urine           |
| C28 | 3-(Phenyl)propionic acid-3'- <i>O</i> -sulfate               | C <sub>9</sub> H <sub>10</sub> O <sub>6</sub> S | 8.6  | 245.0137<br>(4.7)  | 165.0548[M-H-SO <sub>3</sub> ] <sup>-</sup> , 121.0655[M-H-SO <sub>3</sub> -CO <sub>2</sub> ] <sup>-</sup> , 119.0503[M-H-SO <sub>3</sub> -HCOOH] <sup>-</sup> , 106.0428[M-H-SO <sub>3</sub> -CO <sub>2</sub> -CH <sub>3</sub> ] <sup>-</sup> , 93.0350[M-H-SO <sub>3</sub> -CO <sub>2</sub> -C <sub>2</sub> H <sub>4</sub> ] <sup>-</sup> , 79.9591 | Urine           |
| C29 | 3-(Phenyl)propionic acid-4'- <i>O</i> -                      | C <sub>15</sub> H <sub>18</sub> O <sub>9</sub>  | 8.2  | 341.0886           | 297.1001[M-H-CO <sub>2</sub> ] <sup>-</sup> , 279.0890[M-H-CO <sub>2</sub> -H <sub>2</sub> O] <sup>-</sup> , 175.0227[M-H-4HPPA] <sup>-</sup> ,                                                                                                                                                                                                       | Urine           |

Supplementary Materials

|         |                                                            |                                                |     |                    |                                                                                                                                                                                                                                                                |                 |
|---------|------------------------------------------------------------|------------------------------------------------|-----|--------------------|----------------------------------------------------------------------------------------------------------------------------------------------------------------------------------------------------------------------------------------------------------------|-----------------|
|         | glucuronide                                                |                                                |     | (2.2)              | 165.0544[M-H-GlcUA] <sup>-</sup> , 113.0240[M-H-4HPPA-CO <sub>2</sub> -H <sub>2</sub> O] <sup>-</sup> , 80.9670                                                                                                                                                |                 |
| C30     | 3-(Phenyl)propionic acid-3'- <i>O</i> -glucuronide         | C <sub>15</sub> H <sub>18</sub> O <sub>9</sub> | 8.9 | 341.0875<br>(-0.9) | 297.0979[M-H-CO <sub>2</sub> ] <sup>-</sup> , 165.0553[M-H-GlcUA] <sup>-</sup> , 121.0661[M-H-GlcUA-CO <sub>2</sub> ] <sup>-</sup> , 113.0249[M-H-3HPPA-CO <sub>2</sub> -H <sub>2</sub> O] <sup>-</sup> , 80.9662                                              | Urine           |
|         | Phenylacetic acid derivatives                              |                                                |     |                    |                                                                                                                                                                                                                                                                |                 |
| C31     | 3',4'-Dihydroxyphenylacetic acid                           | C <sub>8</sub> H <sub>8</sub> O <sub>4</sub>   | 5.1 | 167.0357<br>(4.2)  | 121.0258[M-H-HCOOH] <sup>-</sup> , 93.0359[M-H-HCOOH-CO] <sup>-</sup>                                                                                                                                                                                          | Urine           |
| C32/C33 | 4'-Hydroxyphenylacetic acid or 3'-Hydroxyphenylacetic acid | C <sub>8</sub> H <sub>8</sub> O <sub>3</sub>   | 9.0 | 151.0408<br>(5.0)  | 107.0507[M-H-CO <sub>2</sub> ] <sup>-</sup> , 79.9613                                                                                                                                                                                                          | Urine,<br>Feces |
| C34     | Phenylacetic acid-4'- <i>O</i> -sulfate                    | C <sub>8</sub> H <sub>8</sub> O <sub>6</sub> S | 6.0 | 230.9971<br>(0.9)  | 151.0399[M-H-SO <sub>3</sub> ] <sup>-</sup> , 121.0484, 107.0497[M-H-SO <sub>3</sub> -CO <sub>2</sub> ] <sup>-</sup>                                                                                                                                           | Urine           |
| C35     | Phenylacetic acid-3'- <i>O</i> -sulfate                    | C <sub>8</sub> H <sub>8</sub> O <sub>6</sub> S | 7.2 | 230.9970<br>(0.6)  | 187.0068[M-H-CO <sub>2</sub> ] <sup>-</sup> , 151.0406[M-H-SO <sub>3</sub> ] <sup>-</sup> , 107.0507[M-H-SO <sub>3</sub> -CO <sub>2</sub> ] <sup>-</sup> , 95.9522, 79.9597                                                                                    | Urine,<br>Feces |
| C36     | Phenylacetic acid-4'- <i>O</i> -glucuronide                | C <sub>14</sub> H <sub>16</sub> O <sub>9</sub> | 6.3 | 327.0719<br>(-0.7) | 283.0802[M-H-CO <sub>2</sub> ] <sup>-</sup> , 175.0207[M-H-4HPAA] <sup>-</sup> , 151.0384[M-H-GlcUA] <sup>-</sup> , 113.0228[M-H-4HPAA-CO <sub>2</sub> -H <sub>2</sub> O] <sup>-</sup> , 107.0504[M-H-GlcUA-CO <sub>2</sub> ] <sup>-</sup> , 99.0078, 87.0091  | Urine           |
| C37     | Phenylacetic acid-3'- <i>O</i> -glucuronide                | C <sub>14</sub> H <sub>16</sub> O <sub>9</sub> | 7.0 | 327.0722<br>(0.2)  | 283.0808[M-H-CO <sub>2</sub> ] <sup>-</sup> , 193.0332, 175.0230[M-H-3HPAA] <sup>-</sup> , 151.0405[M-H-GlcUA] <sup>-</sup> , 124.0129, 113.0241[M-H-3HPAA-CO <sub>2</sub> -H <sub>2</sub> O] <sup>-</sup> , 107.0500[M-H-GlcUA-CO <sub>2</sub> ] <sup>-</sup> | Urine           |
|         | Benzoic acid derivatives                                   |                                                |     |                    |                                                                                                                                                                                                                                                                |                 |
| C38     | 3-Hydroxybenzoic acid                                      | C <sub>7</sub> H <sub>6</sub> O <sub>3</sub>   | 6.8 | 137.0256<br>(4.9)  | 93.0339[M-H-CO <sub>2</sub> ] <sup>-</sup>                                                                                                                                                                                                                     | Urine           |
| C39     | 4-Hydroxybenzoic acid <sup>b</sup>                         | C <sub>7</sub> H <sub>6</sub> O <sub>3</sub>   | 9.0 | 137.0257<br>(5.9)  | 93.0352[M-H-CO <sub>2</sub> ] <sup>-</sup>                                                                                                                                                                                                                     | Urine,<br>Feces |
| C40     | Benzoic acid-4- <i>O</i> -sulfate                          | C <sub>7</sub> H <sub>6</sub> O <sub>6</sub> S | 6.4 | 216.9823<br>(4.7)  | 137.0244[M-H-SO <sub>3</sub> ] <sup>-</sup> , 93.0356[M-H-SO <sub>3</sub> -CO <sub>2</sub> ] <sup>-</sup>                                                                                                                                                      | Urine           |
| C41     | Benzoic acid-3- <i>O</i> -sulfate                          | C <sub>7</sub> H <sub>6</sub> O <sub>6</sub> S | 6.9 | 216.9820           | 137.0241[M-H-SO <sub>3</sub> ] <sup>-</sup> , 93.0358[M-H-SO <sub>3</sub> -CO <sub>2</sub> ] <sup>-</sup>                                                                                                                                                      | Urine           |

Supplementary Materials

|         |                                                        |                                                |     |          |                                                                                                                                                                                                                                                                                                  |                 |  |
|---------|--------------------------------------------------------|------------------------------------------------|-----|----------|--------------------------------------------------------------------------------------------------------------------------------------------------------------------------------------------------------------------------------------------------------------------------------------------------|-----------------|--|
|         |                                                        |                                                |     | (4.9)    |                                                                                                                                                                                                                                                                                                  |                 |  |
| C42     | Benzoic acid-4- <i>O</i> -glucuronide                  | C <sub>13</sub> H <sub>14</sub> O <sub>9</sub> | 6.1 | 313.0565 | 193.0348[M-H-C <sub>7</sub> H <sub>4</sub> O <sub>2</sub> ] <sup>-</sup> , 175.0229[M-H-4HBA] <sup>-</sup> , 137.0241[M-H-GlcUA] <sup>-</sup> ,<br>(0.1) 113.0222[M-H-4HBA-CO <sub>2</sub> -H <sub>2</sub> O] <sup>-</sup> , 85.0296[M-H-4HBA-CO <sub>2</sub> -H <sub>2</sub> O-CO] <sup>-</sup> | Urine           |  |
| C43     | Benzoic acid-3- <i>O</i> -glucuronide                  | C <sub>13</sub> H <sub>14</sub> O <sub>9</sub> | 6.8 | 313.0566 | 193.0343[M-H-C <sub>7</sub> H <sub>4</sub> O <sub>2</sub> ] <sup>-</sup> , 175.0228[M-H-3HBA] <sup>-</sup> , 137.0241[M-H-GlcUA] <sup>-</sup> ,<br>(0.4) 113.0246[M-H-4HBA-CO <sub>2</sub> -H <sub>2</sub> O] <sup>-</sup> , 93.0381[M-H-GlcUA-CO <sub>2</sub> ] <sup>-</sup>                    | Urine           |  |
|         | Benzoylglycine derivatives                             |                                                |     |          |                                                                                                                                                                                                                                                                                                  |                 |  |
| C44     | Hippuric acid <sup>b</sup>                             | C <sub>9</sub> H <sub>9</sub> NO <sub>3</sub>  | 8.9 | 178.0522 | 134.0610[M-H-CO <sub>2</sub> ] <sup>-</sup> , 102.0354, 77.0422<br>(6.8)                                                                                                                                                                                                                         | Urine,<br>Feces |  |
| C45/C46 | 4'-Hydroxyhippuric acid or 3'-<br>Hydroxyhippuric acid | C <sub>9</sub> H <sub>9</sub> NO <sub>4</sub>  | 7.0 | 194.0464 | 150.0550[M-H-CO <sub>2</sub> ] <sup>-</sup> , 132.0427[M-H-CO <sub>2</sub> -H <sub>2</sub> O] <sup>-</sup> , 100.0045, 93.0357<br>(2.8)                                                                                                                                                          | Urine           |  |

<sup>a</sup> The losses are: GlcUA = glucuronyl moiety, 3H4MPEA=3-(3'-hydroxy-4'-methoxyphenyl)-2-propenoic acid, CA=caffeic acid, 4HPEA=3-(4'-hydroxyphenyl)-2-propenoic acid, 3HPEA=3-(3'-hydroxyphenyl)-2-propenoic acid, 3H4MPPA=3-(3'-hydroxy-4'-methoxyphenyl)propionic acid, 3H4HPPA=3-(3',4'-Dihydroxyphenyl)propionic acid, 4HPPA=3-(4'-Hydroxyphenyl)propionic acid, 3HPPA=3-(3'-Hydroxyphenyl)propionic acid, 4HBA=4-hydroxybenzoic acid, 3HBA=3-hydroxybenzoic acid.

<sup>b</sup> Confirmation in comparison with authentic standards.

Supplementary Materials

Table S5. The volumes (mL) of urine collected from 12 aged rats during each time period.

| Time (h) | Rat 1 | Rat 2 | Rat 3 | Rat 4 | Rat 5 | Rat 6 | Rat 7 | Rat 8 | Rat 9 | Rat 10 | Rat 11 | Rat 12 |
|----------|-------|-------|-------|-------|-------|-------|-------|-------|-------|--------|--------|--------|
| 0-4      | 4.2   | 5.0   | 4.2   | 3.9   | 2.8   | 3.2   | 5.2   | 3.3   | 4.4   | 4.7    | 6.2    | 3.0    |
| 4-8      | 2.6   | 2.1   | 2.4   | 1.5   | 2.5   | 0.0   | 0.0   | 6.4   | 1.8   | 0.0    | 8.9    | 6.5    |
| 8-12     | 2.3   | 1.1   | 3.1   | 2.2   | 3.1   | 3.6   | 0.0   | 0.0   | 2.3   | 0.0    | 2.2    | 8.4    |
| 12-24    | 9.4   | 8.8   | 25.5  | 12.6  | 14.0  | 10.9  | 21.8  | 6.0   | 3.3   | 13.0   | 6.5    | 37.5   |
| 24-36    | 3.9   | 6.0   | 7.4   | 4.4   | 2.8   | 4.0   | 5.6   | 6.4   | 2.9   | 0.0    | 9.5    | 8.4    |
| 36-48    | 10.5  | 5.8   | 13.8  | 8.0   | 10.4  | 9.7   | 10.6  | 12.4  | 6.6   | 5.9    | 7.5    | 23.8   |

Table S6. The weight (mg) of feces collected from 12 aged rats during each time period.

| Time (h) | Rat 1 | Rat 2 | Rat 3 | Rat 4 | Rat 5 | Rat 6 | Rat 7  | Rat 8  | Rat 9  | Rat 10 | Rat 11 | Rat 12 |
|----------|-------|-------|-------|-------|-------|-------|--------|--------|--------|--------|--------|--------|
| 0-4      | 685.8 | 0     | 0     | 0     | 0     | 0     | 0      | 1044.7 | 0      | 0      | 0      | 0      |
| 4-8      | 0     | 0     | 0     | 377.2 | 0     | 0     | 0      | 0      | 0      | 0      | 0      | 0      |
| 8-12     | 0     | 0     | 0     | 0     | 0     | 0     | 0      | 0      | 0      | 0      | 0      | 0      |
| 12-24    | 0     | 0     | 0     | 55.9  | 0     | 529.2 | 0      | 0      | 1088.1 | 0      | 275.1  | 0      |
| 24-36    | 0     | 612.7 | 0     | 0     | 0     | 0     | 0      | 1000.3 | 0      | 0      | 208.6  | 182.0  |
| 36-48    | 739.4 | 0     | 0     | 161.5 | 527.0 | 113.8 | 1073.8 | 0      | 0      | 0      | 1023.7 | 0      |

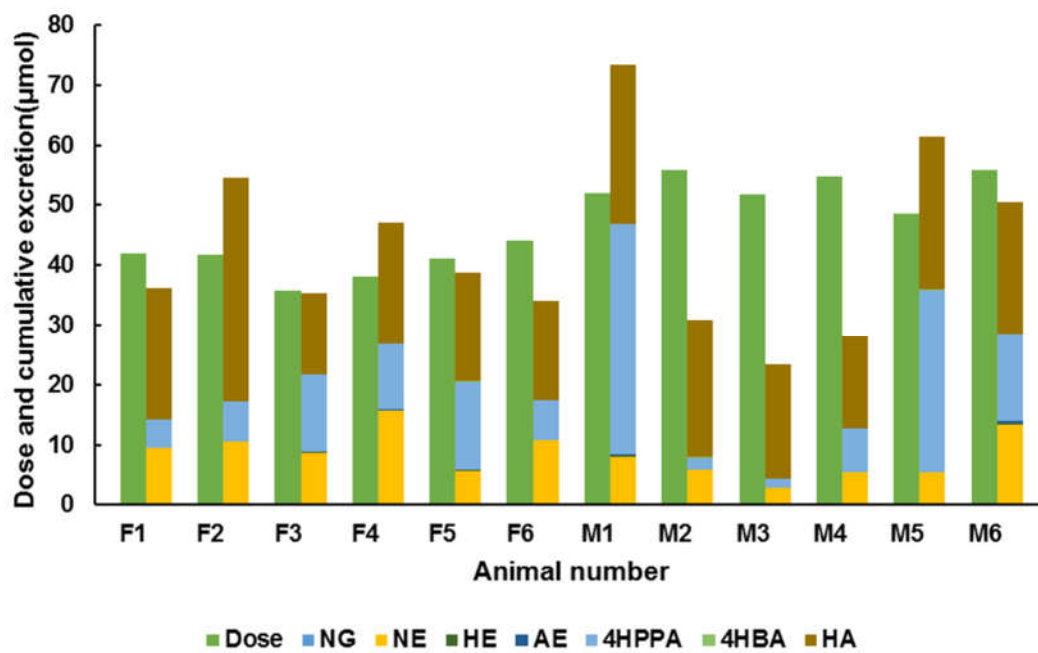

Fig. S1. Dose and cumulative excretion of naringin (NG) and its main metabolites (naringenin (NE), hesperetin (HE), apigenin (AE), hippuric acid (HA), 4-hydroxybenzoic acid (4HBA), and 3-(4'-hydroxyphenyl)propionic acid (4HPPA)) in twelve aged rats.
